# Supplementary material for: Multimodal dynamic color-tunable persistent luminescent phosphor Ca3Al2Ge3O12:Mn2+,Cr3+ for anti-counterfeiting and industrial inspection
Source: Royal Society of Chemistry journal article supplement (doi:10.1039/d2qi02041f), 2022-01-01
Supplement: d2qi02041f1.pdf [file d2qi02041f1.pdf]

### Support information

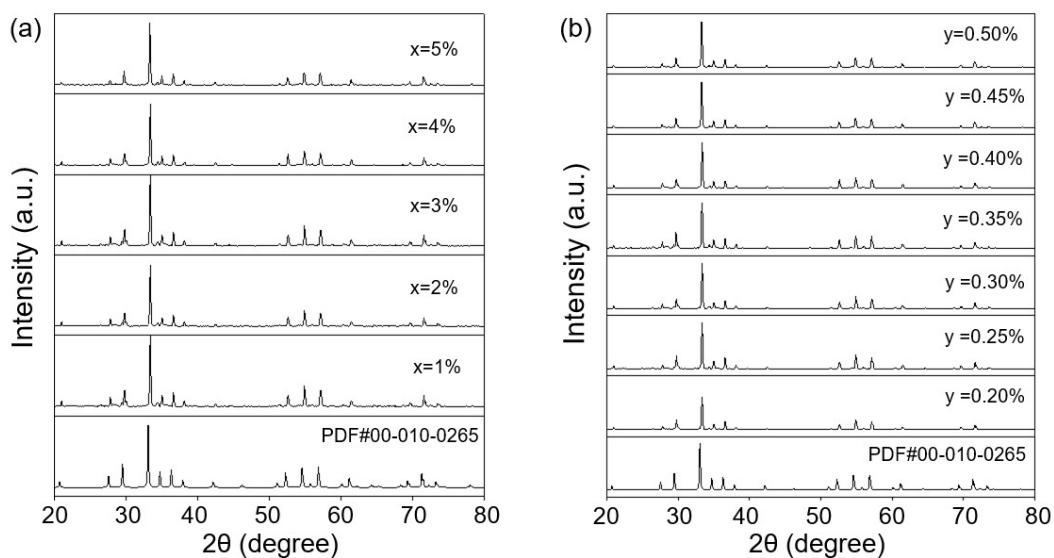

Fig.S1 (a) XRD patterns of CAG: $x\text{Mn}^{2+}$  ( $x=1\%-5\%$ ) and CAG:2% $\text{Mn}^{2+}$ ,  $y\text{Cr}^{3+}$  ( $y=0.2\%-0.5\%$ ).

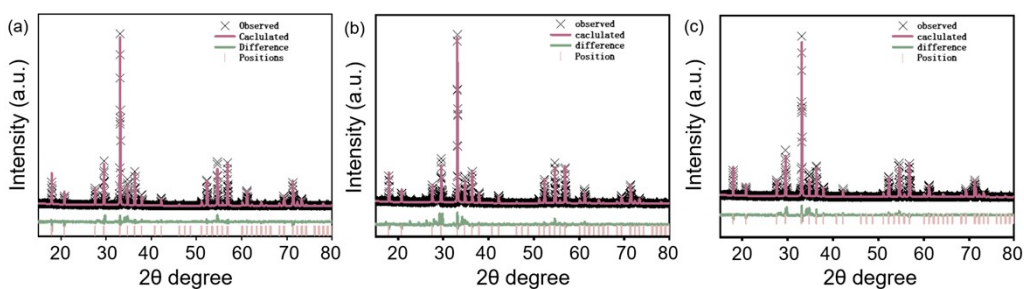

Fig.S2 The refinement XRD patterns of CAG:2% $\text{Mn}^{2+}$ ,  $y\text{Cr}^{3+}$  ( $y=0.2\%-0.4\%$ ).

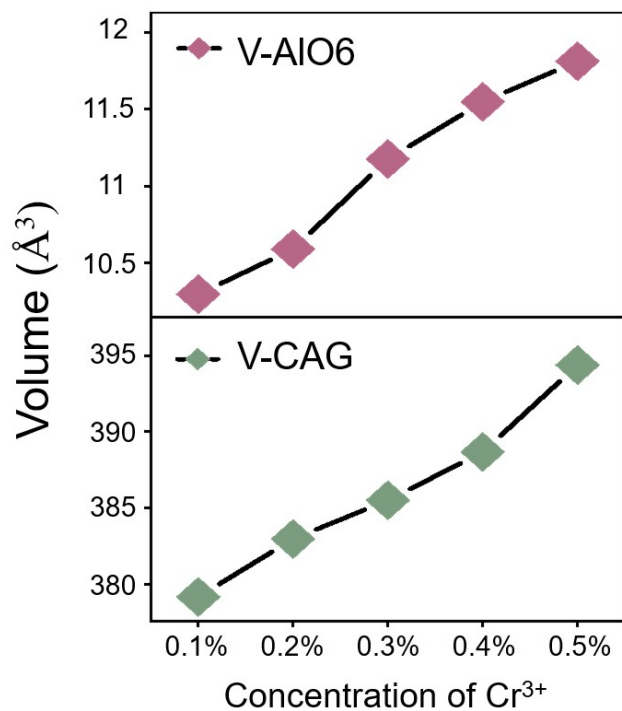

Fig.S3 Variation of lattice volume and CAG volume of AlO6.

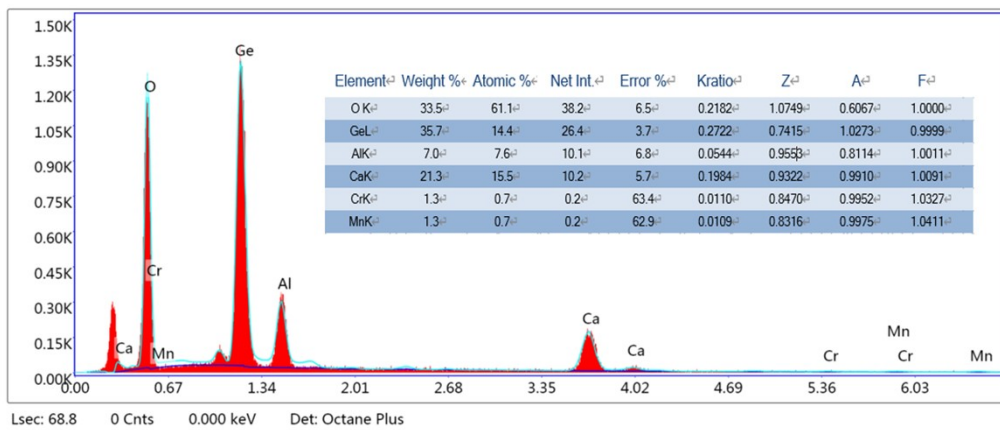

Fig.S4 EDS spectrum of CAG:2%Mn<sup>2+</sup>, 0.5%Cr<sup>3+</sup>, inset: the weight and atomic percentage.

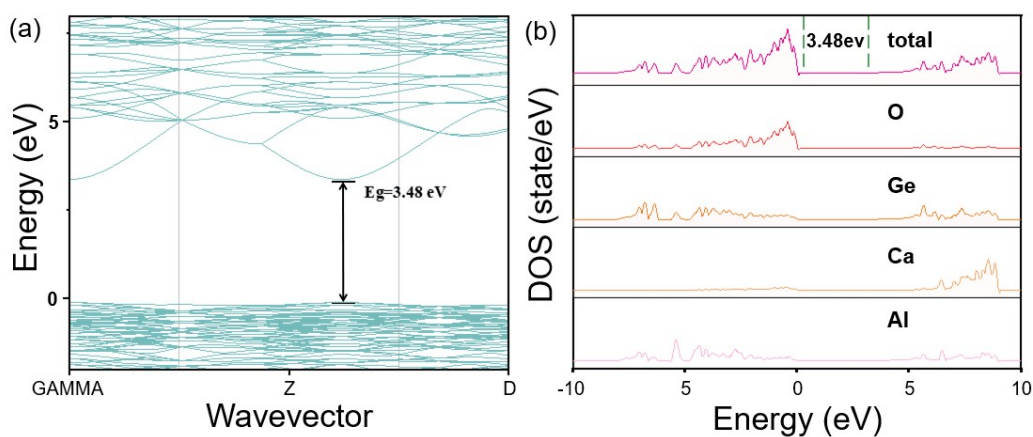

Fig.S5 (a) Calculated band structure of host CAG based on the refined crystallographic results using first principles. (b) Total density of states (TDOS) and partial density of states (PDOS) of CAG.

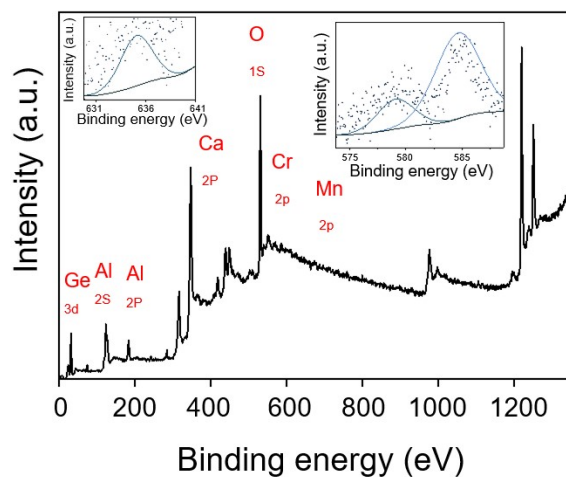

Fig.S6 XPS spectrum of CAG:2%Mn<sup>2+</sup>, 0.5%Cr<sup>3+</sup>; inset: the XPS spectrum of Cr<sup>3+</sup> at the 2p<sub>1/2</sub> energy level.

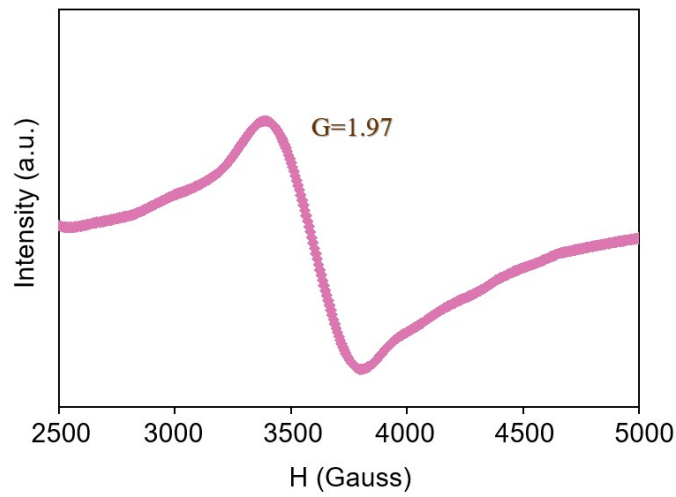

Fig.S7 EPR spectra of CAG:2%Mn<sup>2+</sup>, 0.5%Cr<sup>3+</sup> under UV irradiation 11min at 77 K.

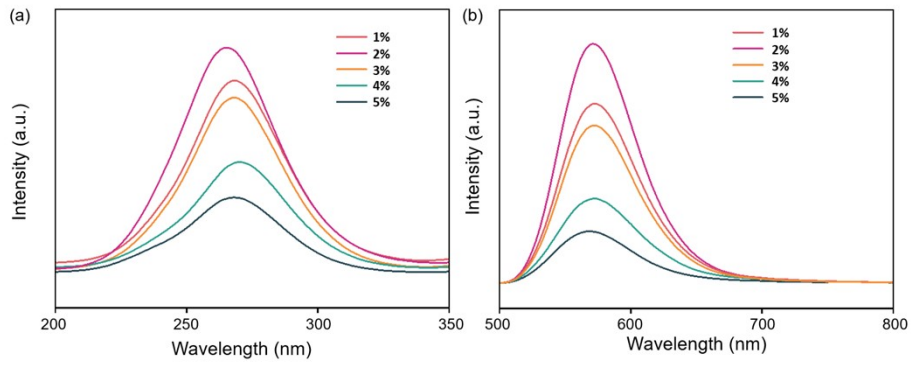

Fig.S8 (a) PLE and (b) PL spectra of CAG: $x$ Mn<sup>2+</sup> ( $x=1\%-5\%$ ,  $\lambda_{em} = 568 \text{ nm}$ ,  $\lambda_{ex} = 265 \text{ nm}$ ).

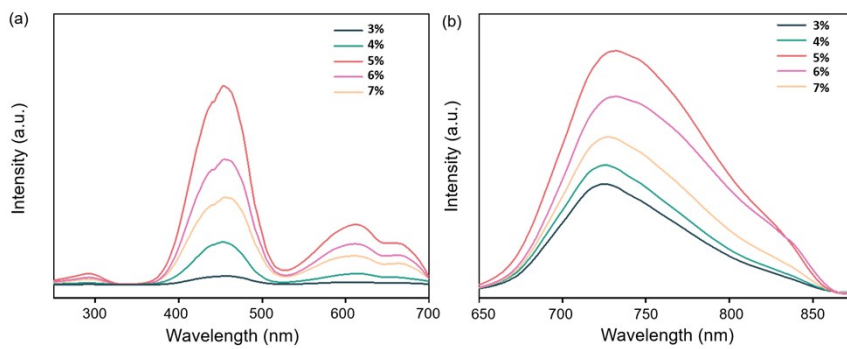

Fig.S9 (a) PLE and (b) PL spectra of CAG: $x$ Cr<sup>3+</sup> ( $x=3\%-7\%$ ,  $\lambda_{em} = 722 \text{ nm}$ ,  $\lambda_{ex} = 454 \text{ nm}$ ).

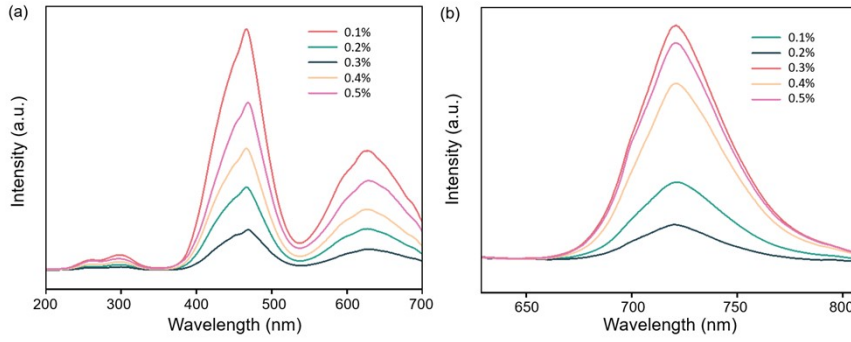

Fig.S10 (a) PLE and (b) PL spectra of CAG:2%Mn<sup>2+</sup>, yCr<sup>3+</sup> (y=0.1%-0.5%,  $\lambda_{em}$ =722 nm,  $\lambda_{ex}$ =465 nm).

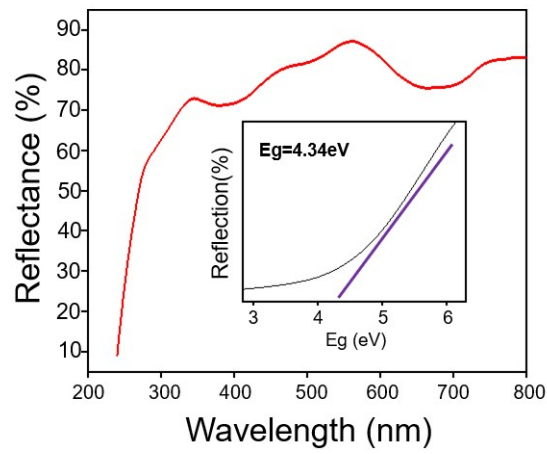

Fig.S11 The diffuse reflection spectra of CAG:2%Mn<sup>2+</sup>, 0.5%Cr<sup>3+</sup>; inset: the calculation and analysis result of bandgap width.

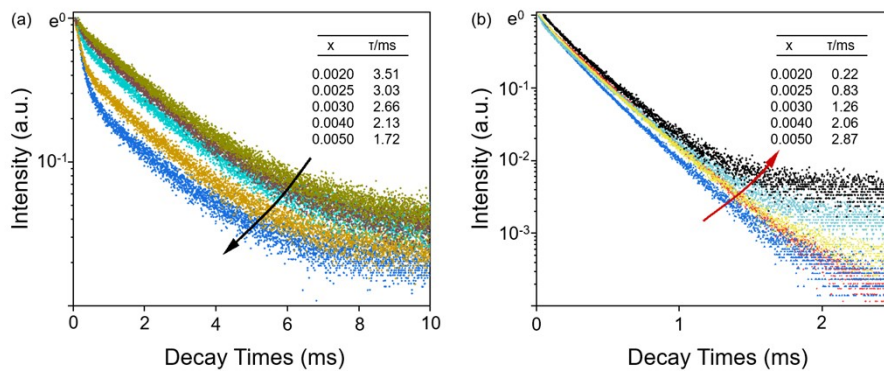

Fig.S12 (a) Decay curves of Mn<sup>2+</sup> ( $\lambda_{em}$ =568 nm) (b) Decay curves of Cr<sup>3+</sup> ( $\lambda_{em}$ =722 nm).

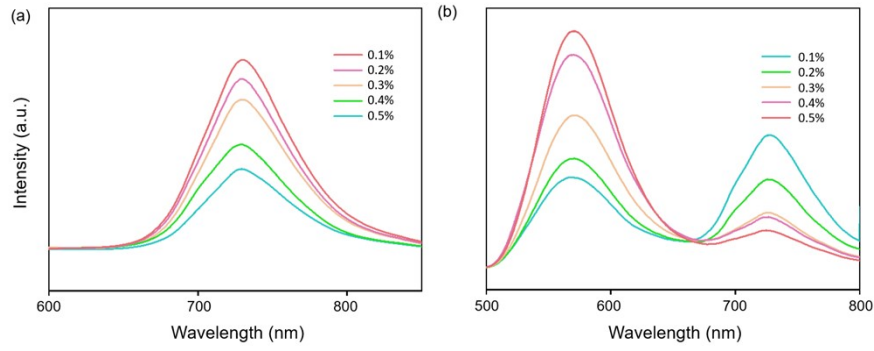

Fig.S13 PersL spectra ( $\lambda_{ex}=454$  nm) (a) and ( $\lambda_{ex}=254$  nm) (b).

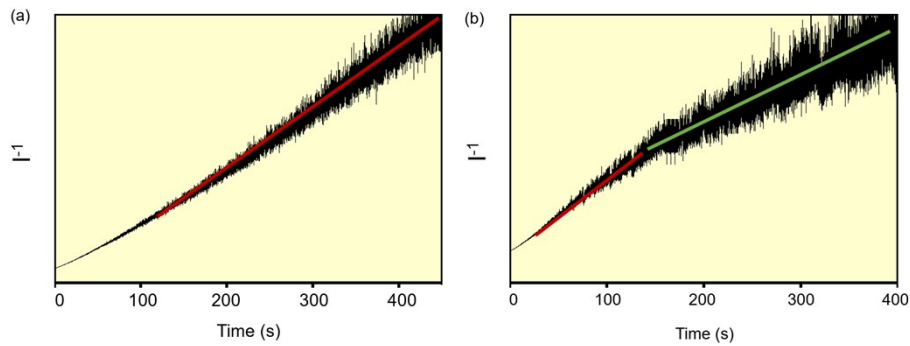

Fig. S14 The inverse of the afterglow intensity of CAG:2%  $Mn^{2+}$ , 0.5%  $Cr^{3+}$  as a function of decay time ( $\lambda_{em}=568$  nm) (a) and ( $\lambda_{em}=722$  nm) (b).

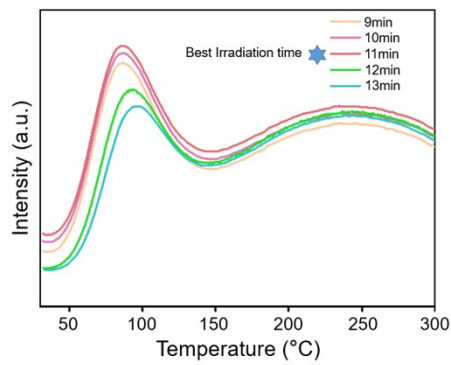

Fig. S15 The TL spectra of CAG:2%  $Mn^{2+}$ , 0.5%  $Cr^{3+}$  varies with different irradiation times.

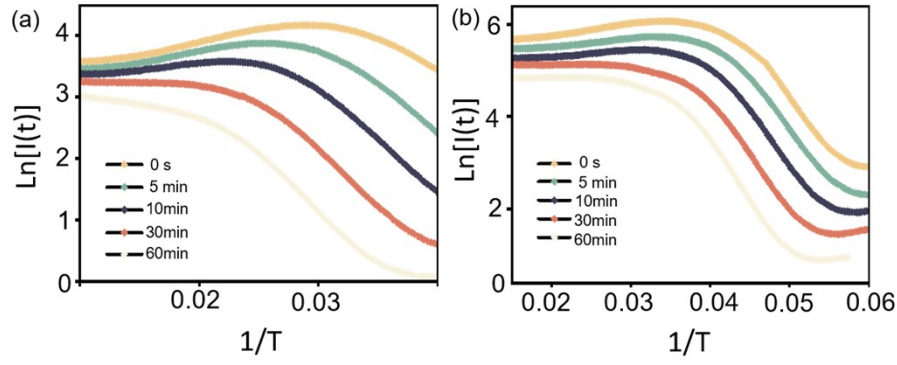

Fig. S16 The inverse of the afterglow intensity of CAG:2% Mn<sup>2+</sup>, 0.5% Cr<sup>3+</sup> as a function of decay time ( $\lambda_{em}=568$  nm) (a) and ( $\lambda_{em}=722$  nm) (b).

Table S1 Commission International de l'Eclairage (CIE) for CAG:2%Mn, x%Cr (x=0.2%,0.5%) chromaticity coordinates column at different temperatures.

| Samples                              | X      | Y      |
|--------------------------------------|--------|--------|
| <b>300K</b>                          |        |        |
| <b>CAG: 2% Mn<sup>2+</sup>, 0.2%</b> | 0.2957 | 0.6122 |
| <b>Cr<sup>3+</sup></b>               | 0.5628 | 0.3714 |
| <b>CAG: 2% Mn<sup>2+</sup>, 0.5%</b> |        |        |
| <b>Cr<sup>3+</sup></b>               |        |        |
| <b>473K</b>                          |        |        |
| <b>CAG: 2% Mn<sup>2+</sup>, 0.2%</b> | 0.4211 | 0.2346 |
| <b>Cr<sup>3+</sup></b>               | 0.5754 | 0.3152 |
| <b>CAG: 2% Mn<sup>2+</sup>, 0.5%</b> |        |        |
| <b>Cr<sup>3+</sup></b>               |        |        |

Note: There are two ways to calculate energy transfer efficiency --- by PL intensity and lifetime, respectively. The first one is calculated by PL intensity which is influenced merely by the ET process, the ET efficiency from Mn<sup>2+</sup> to Cr<sup>3+</sup>, can be calculated by<sup>1-2</sup>

$$\eta_{ET} = 1 - \frac{I_{Mn}}{I_{Mn0}} \quad (S1)$$

where  $I_{Mn}$  and  $I_{Mn0}$  were the Cr emission intensity in the absence and in the presence of Cr<sup>3+</sup>. The

second one is calculating by the decreases of lifetime. The ET efficiency  $\eta_{ET}$  from Mn<sup>2+</sup> to

Cr<sup>3+</sup> can be calculated by the following equation<sup>3</sup>:

$$\eta'_{ET} = 1 - \frac{\tau_{Mn}}{\tau_{Mn0}} \quad (S2)$$

where  $\tau_{Mn}$  represents the lifetime of  $Mn^{2+}$  with various  $Cr^{3+}$  concentration, and  $\tau_{Mn0}$  is the lifetime of  $Mn^{2+}$  in  $Mn^{2+}$  single-doped sample. It may be noticed that the values calculated by Equation (S2) are apparently smaller than those calculated by Equation (S1), which may be explained by experimental error from the measurement of the spectrum. So, we use the average values of the ET efficiency.

#### References

1. He, S.; Zhang, L. L.; Wu, H.; Wu, H. J.; Pan, G. H.; Hao, Z. D.; Zhang, X.; Zhang, L. G.; Zhang, H.; Zhang, J. H., Efficient Super Broadband NIR  $Ca_2LuZr_2Al_3O_{12}:Cr^{3+},Yb^{3+}$  Garnet Phosphor for pc-LED Light Source toward NIR Spectroscopy Applications. *Adv Opt Mater* **2020**, *8* (6), 1901684.1.
2. Basore, E. T.; Wu, H. J.; Xiao, W. G.; Zheng, G. J.; Liu, X. F.; Qiu, J. R., High-Power Broadband NIR LEDs Enabled by Highly Efficient Blue-to-NIR Conversion. *Adv Opt Mater* **2021**, *9* (7), 2001660.
3. Liu, D. J.; Li, G. G.; Dang, P. P.; Zhang, Q. Q.; Wei, Y.; Qiu, L.; Molochev, M. S.; Lian, H. Z.; Shang, M. M.; Lin, J., Highly efficient  $Fe^{3+}$ -doped  $A(2)BB'O_6$  ( $A = Sr^{2+}, Ca^{2+}$ ;  $B, B' = In^{3+}, Sb^{5+}, Sn^{4+}$ ) broadband near-infrared-emitting phosphors for spectroscopic analysis. *Light: Sci & Appl* **2022**, *11* (1), 969.
